# Supplementary material for: How does a slender tibia resist buckling? The effect of material, structural and geometric characteristics on the buckling behaviour of the hindleg tibia in the postembryonic development of the stick insectCarausius morosus
Source: Oxford University Press journal article supplement (doi:10.1242/jeb.173047), 2017-01-01
Supplement: jeb173047supp.pdf [file jeb173047supp.pdf]

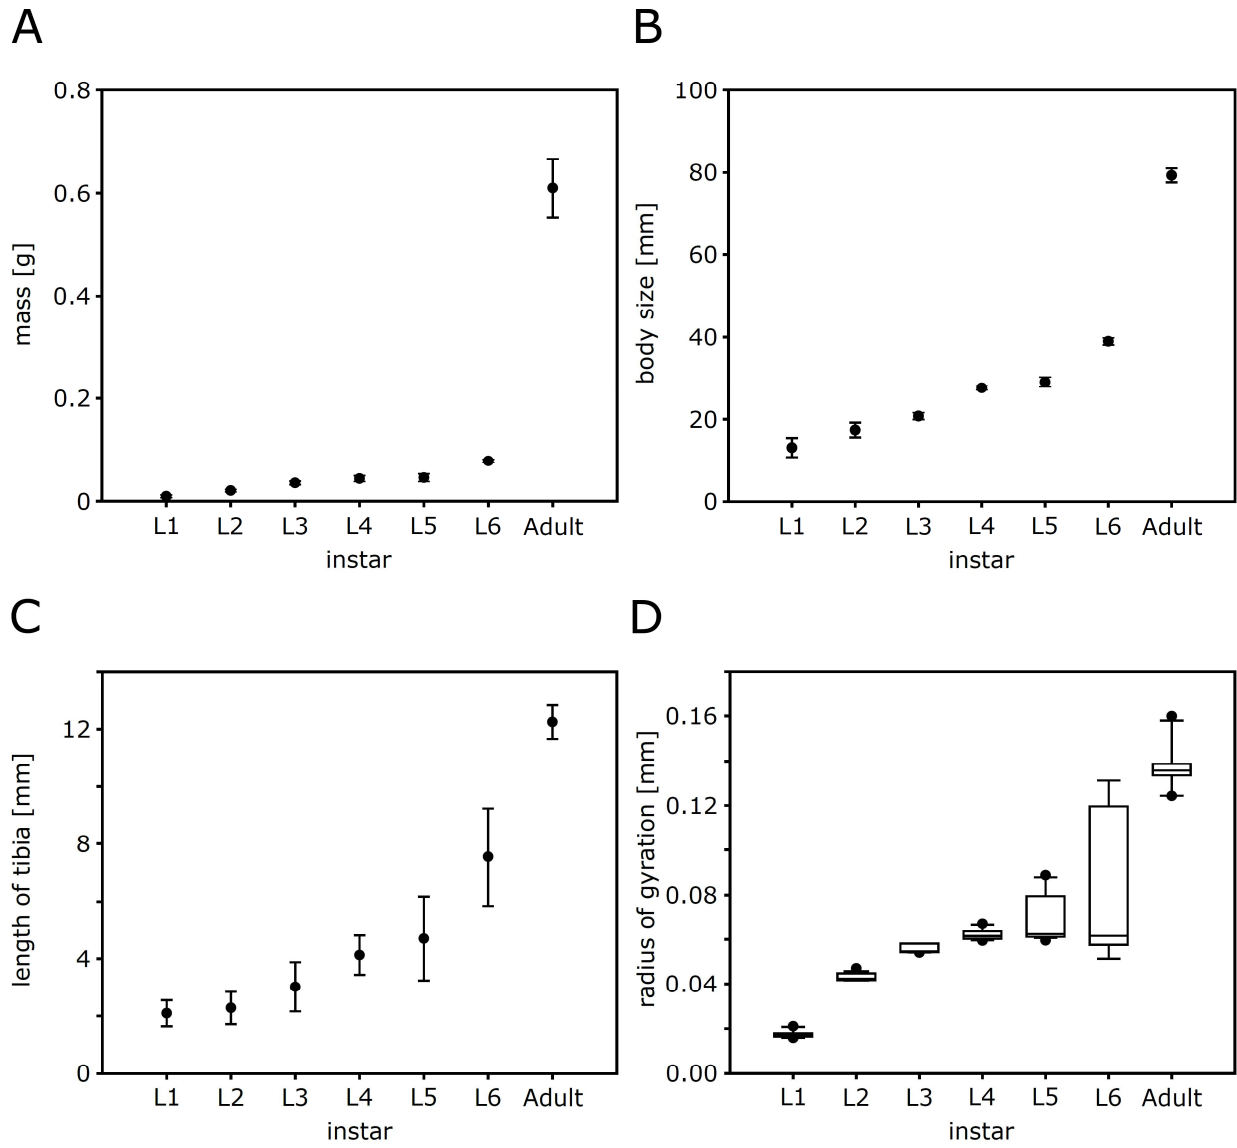

Fig. S1. Changes of (A) body mass, (B) body size, (C) length of the tibia and (D) radius of gyration of the tibia at all postembryonic developmental stages of the stick insect *C. morosus*.

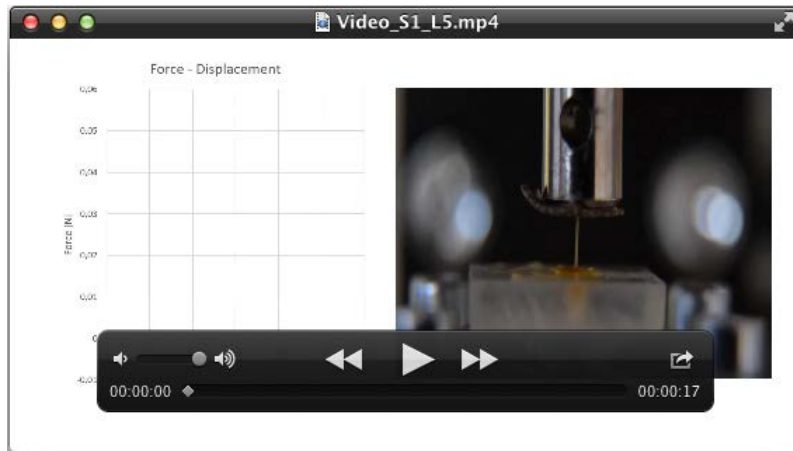

Movie 1. The onset and evolution of local buckling in a tibia specimen at the fifth nymphal stage (L5).

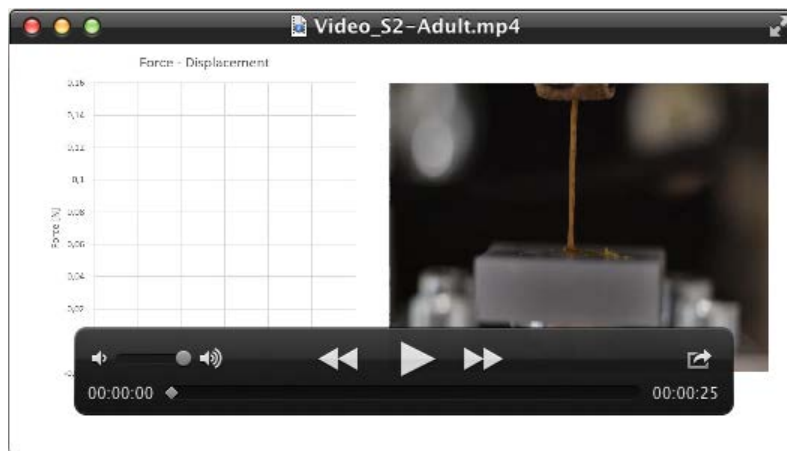

Movie 2. The onset and evolution of Euler buckling in a tibia specimen at the adult stage.
